# Supplementary material
Source: Springer Nature journal article supplement (https://www.springermedizin.de/resource/supplementary/12933_2012_481_MOESM4_ESM.pdf/9538676)

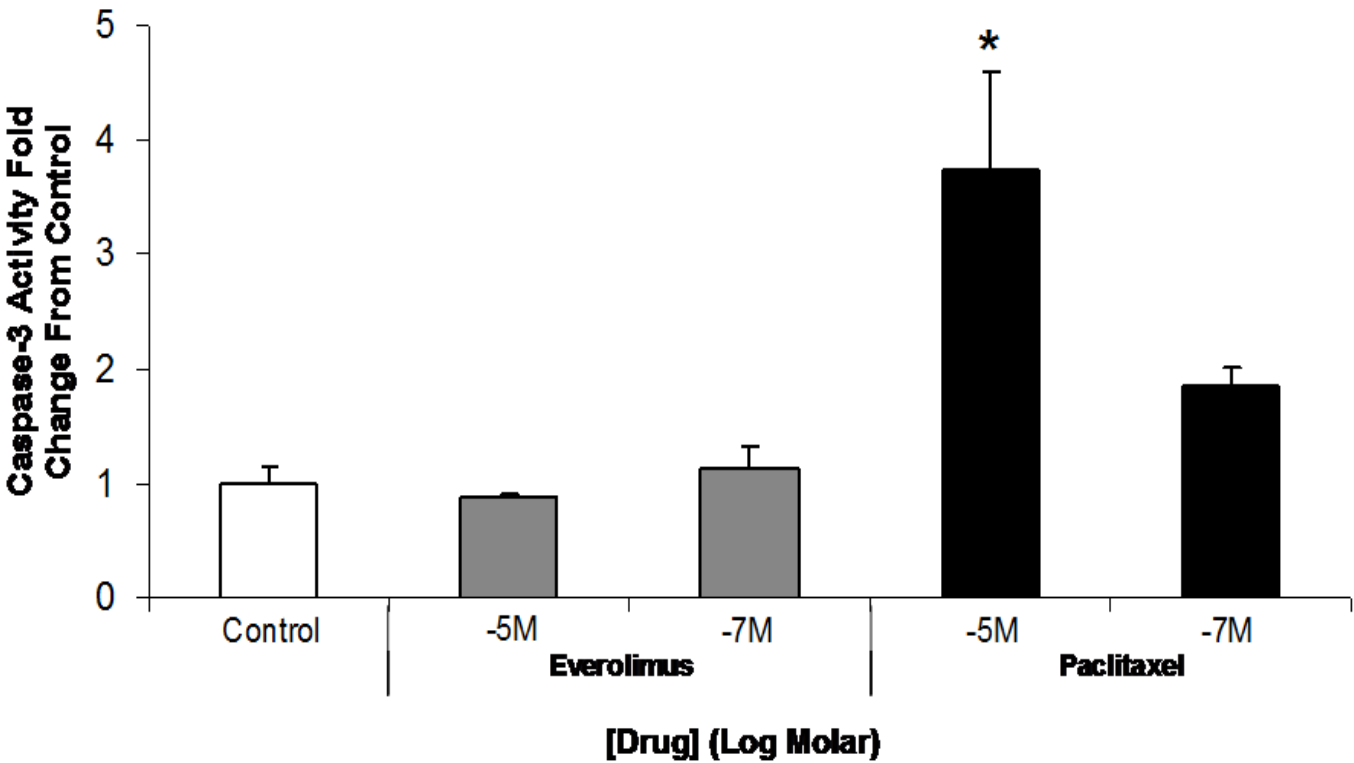

Supplement: MOESM4 [file 9538676]
